# Supplementary material
Source: publisher figshare collection journal article supplement (https://acs.figshare.com/ndownloader/files/13291610)
Supplement: Supplementary file 1 [file 13291610]

## Supporting Information

# Palladium-Catalyzed Hydroxycarbonylation of 1-Dodecene in Microemulsion Systems: Does Reaction Performance Care about Phase Behavior?

*Marcel Schmidt<sup>†\*</sup>, Carolina Urban<sup>†</sup>, Svenja Schmidt<sup>†</sup>, Reinhard Schomäcker<sup>†</sup>*

<sup>†</sup> Department of Chemistry, Technische Universität Berlin, Str. des 17. Juni 124, Sekr. TC-8,  
D-10623 Berlin, Germany

\*corresponding author: Marcel Schmidt (marcel.schmidt@tu-berlin.de)

## **S1 Chemical structure of the applied surfactants**

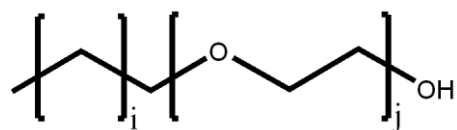

i=11-13

j=2 (Marlipal 24/20)

j=3 (Marlipal 24/30)

j=4 (Marlipal 24/40)

j=5 (Marlipal 24/50)

j=6 (Marlipal 24/60)

j=7 (Marlipal 24/70)

j=8 (Marlipal 24/80)

**Figure S1.** Chemical structure of the applied surfactants.

## S2 Variation of the ionic strength

We investigated the effect on the initial rate of hydroxycarbonylation, the l:b regioselectivity and the chemoselectivity with different amounts of sodium sulfate as shown in Figure S1. In general, the initial rate of hydroxycarbonylation decreases significantly from 18 mmol/(L·h) for no added salt to 1.5 mmol/(L·h) for 6 wt % sodium sulfate. We have to mention that it was found that the ligand SulfoXantPhos precipitates at salt concentrations above 6 wt % due to a salting out effect. The increase of the ionic strength leads to a lower solubility of SulfoXantPhos in water which results in its precipitation.

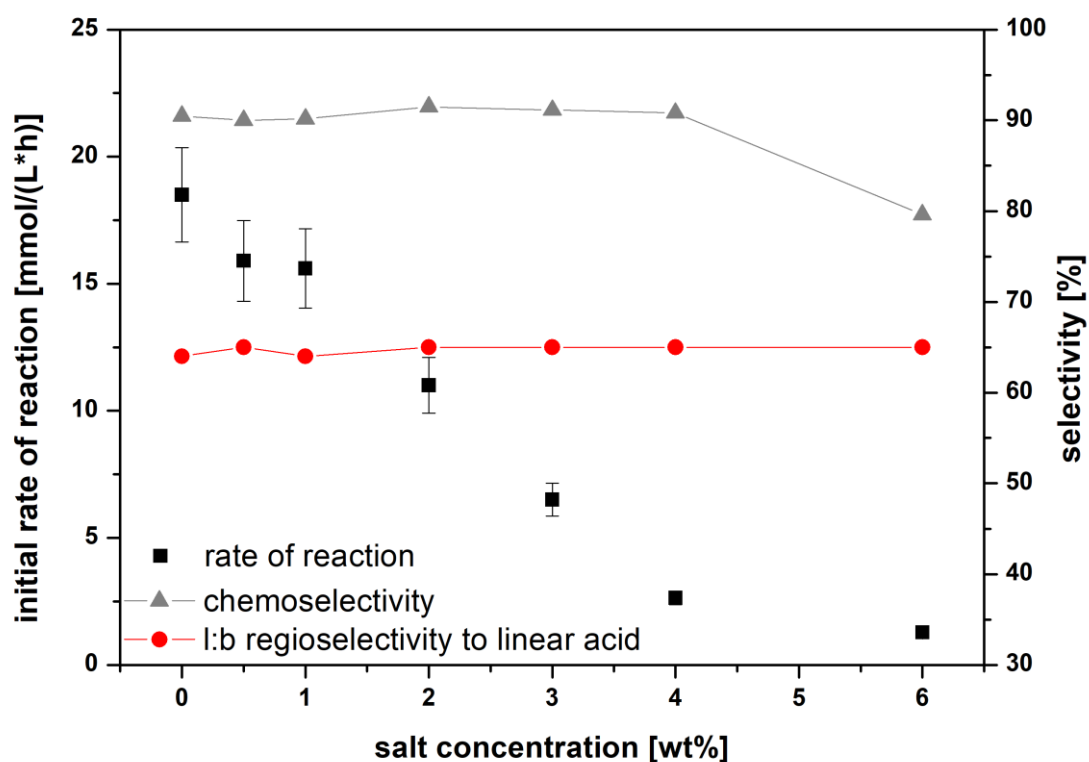

**Figure S2.** Effect of salt concentration on the hydroxycarbonylation of 1-dodecene. Experimental conditions:  $\text{Pd}_2(\text{allyl})_2\text{Cl}_2$  (0.08 mmol),  $\text{Pd}/\text{SX}/\text{MSA}/1\text{-dodecene}$  (1:4:40:110),  $\alpha=0.5$ , tetradecane as the cosolvent (9 g), water (12 g), Marlupal 24/70 as the surfactant,  $\gamma=9\%$ ,  $\text{Na}_2\text{SO}_4$  as salt,  $p(\text{CO})=30$  bar,  $T=85^\circ\text{C}$ ,  $n=1200$  rpm,  $t=20$  h,  $V_R=0.03$  L.

Besides the reaction rate, the 1:b selectivity remains constant at 65:35 and the chemoselectivity at a value of 90% for salt concentrations of up to 4wt%. The chemoselectivity drops to 80% with 6 wt% sodium sulfate in the reaction mixture. Apparently, the precipitation of the catalyst complex leads to a higher isomerization of 1-dodecene. For all experiments 1wt% sodium sulfate was chosen because of an accelerated phase separation.
